# Supplementary material
Source: publisher site journal article supplement (https://www.dovepress.com/article/366927)
Supplement: Supplementary file 1 [file get_supplementary_file.php]

**SUPPLEMENTAL MATERIAL**

**Modified Citrus Pectin Alleviates Cerebral Ischemia/Reperfusion Injury by Inhibiting NLRP3 Inflammasome Activation via TLR4/NF-ĸB Signaling Pathway in Microglia**

**Yu Cui, Nan-Nan Zhang, Dan Wang, Wei-Hong Meng, Hui-Sheng Chen**

**Supplemental Tables**

**Supplemental Figures**

**Supplemental Tables**

**Table 1. ARRIVE guideline checklist.**


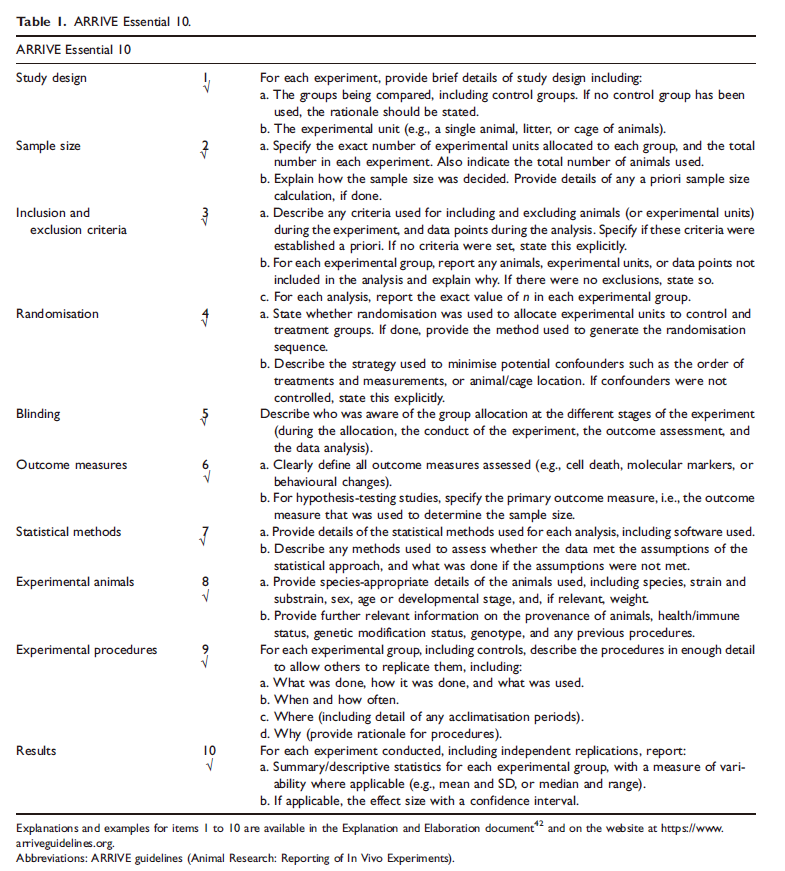


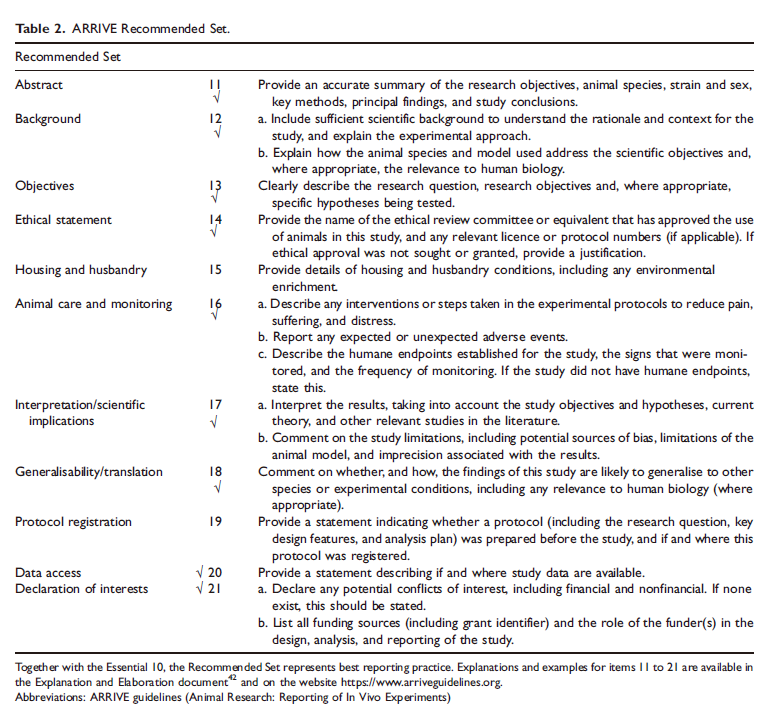


**Table 2 The number of C57BL/6J mice used in the animal experiment.**

| **Groups** | **Sham**  **+**  **Vehicle** | **MCAO/R**  **+**  **Vehicle** | **MCAO/R**  **+**  **MCP 200 mg/kg/d** | **MCAO/R**  **+**  **MCP 400 mg/kg/d** | **MCAO/R**  **+**  **MCP 800 mg/kg/d** |
| --- | --- | --- | --- | --- | --- |
| **Mice in each group** | 9 | 18 | 18 | 18 | 18 |
| **Failed to establish model** | 0 | 3 | 2 | 5 | 2 |
| **Dead** | 0 | 6 | 7 | 4 | 7 |
| **Neurological deficit scoring** | 9 | 9 | 9 | 9 | 9 |
| **Infarction size (TTC staining)**  **Brain water content** | 3 | 3 | 3 | 3 | 3 |
| **Immunohistochemistry** | 3 | 3 | 3 | 3 | 3 |
| **Western blot assays** | 3 | 3 | 3 | 3 | 3 |

MCAO/R indicates middle cerebral artery occlusion/reperfusion; MCP, modified citrus pectin; TTC, 2,3,5-triphenyltetrazolium chloride.

**Table 3. Numerical data for MCP pretreatment with 7 days showing effects of MCP on neurological deficit scoring and infarction size of C57BL/6J mice at 1 day after MCAO/R operation in the preliminary study.**

| **Group** | **Number of animals** | **Neurological deficit scoring** | **Infarction size** |
| --- | --- | --- | --- |
| **MCAO/R + Vehicle** | 1 | 3 | 54.83% |
| **MCAO/R + 200 mg/kg/d MCP** | 1 | 2 | 34.34% |
| **MCAO/R + 400 mg/kg/d MCP** | 1 | 2 | 32.22% |
| **MCAO/R + 800 mg/kg/d MCP** | 1 | 1 | 12.02% |

MCAO/R indicates middle cerebral artery occlusion/reperfusion; MCP, modified citrus pectin.

**Table 4. Numerical data for MCP treatment with 7 days showing effects of MCP on neurological deficit scoring of C57BL/6J mice at 7 day after MCAO/R operation in the preliminary study.**

| **Group** | **Number of animals** | **Neurological deficit scoring** | | | |
| --- | --- | --- | --- | --- | --- |
| **Day 1** | **Day 3** | **Day 5** | **Day 7** |
| **MCAO/R + Vehicle** | 3 | 2.83 | 2.33 | 2.17 | 1.67 |
| **MCAO/R + 200 mg/kg/d MCP** | 3 | 2.67 | 2.33 | 2.17 | 1.50 |
| **MCAO/R + 400 mg/kg/d MCP** | 3 | 2.50 | 2.33 | 1.83 | 1.17 |
| **MCAO/R + 800 mg/kg/d MCP** | 3 | 2.50 | 2.00 | 1.17 | 0.67 |

MCAO/R indicates middle cerebral artery occlusion/reperfusion; MCP, modified citrus pectin.

**Table 5. Numerical data for selection of optimal concentration for MCP in both HT-22 and BV-2 cells through CCK-8 assays in the preliminary study.**

| **Group** | **HT-22 cells** | | **BV-2 cells** | |
| --- | --- | --- | --- | --- |
| **Number of cells** | **Cell viability** | **Number of cells** | **Cell viability** |
| **OGD/R** | 5 | 100%±0.00% | 5 | 100%±0.00% |
| **OGD/R + 0.1 g/L MCP** | 5 | 104.38%±14.32% | 5 | 102.72%±28.81% |
| **OGD/R + 0.2 g/L MCP** | 5 | 105.04%±11.97% | 5 | 106.30%±23.87% |
| **OGD/R + 0.5 g/L MCP** | 5 | 114.97%±24.64% | 5 | 101.29%±14.52% |
| **OGD/R + 1 g/L MCP** | 5 | 113.47%±11.19% | 5 | **112.94%±20.87%*** |
| **OGD/R + 2 g/L MCP** | 5 | 121.11%±19.33% | 5 | **125.86%±37.86%*** |
| **OGD/R + 5 g/L MCP** | 5 | 119.73%±9.86% | 5 | **130.93%±26.06%*** |
| **OGD/R + 10 g/L MCP** | 5 | 122.49%±23.05% | 5 | **133.25%±31.08%*** |

OGD/R indicates oxygen-glucose deprivation/reperfusion; MCP, modified citrus pectin.*, compared with OGD/R group, the change of cell viability showed significant difference with *P* value < 0.05.

**Table 6. Numerical data for selection of optimal time for OGD in both HT-22 and BV-2 cells through CCK-8 assays in the preliminary study.**

| **Group** | **HT-22 cells** | | **BV-2 cells** | |
| --- | --- | --- | --- | --- |
| **Number of cells** | **Cell viability** | **Number of cells** | **Cell viability** |
| **OGD 0h** | 5 | 100%±0.00% | 5 | 100%±0.00% |
| **OGD 2h** | 5 | 101.78%±16.25% | 5 | 99.58%±20.53% |
| **OGD 4h** | 5 | 90.58%±14.31% | 5 | 84.67%±18.55% |
| **OGD 6h** | 5 | **85.37%±9.21%*** | 5 | **70.40%±14.79%*** |
| **OGD 8h** | 5 | **69.23%±11.55%*** | **5** | **62.96%±7.30%*** |

OGD indicates oxygen-glucose deprivation. *, compared with OGD 0h group, the change of cell viability showed significant difference with *P* value < 0.05.

**Table 7. Numerical data for MCP pretreatment with 7 days showing effects of MCP on neurological deficit scoring, brain water content and infarction size of C57BL/6J mice at 1 day after MCAO/R operation.**

| **Group** | **Neurological deficit scoring** | **Brain water content** | **Infarction size** |
| --- | --- | --- | --- |
| **Number of animals per group** | 9 | 3 | 3 |
| **Sham + Vehicle** | 0.00±0.00 | 78.87%±0.71% | 0.00%±0.00% |
| **MCAO/R + Vehicle** | 2.67±0.50 | 83.90%±0.46% | 62.76%±12.18% |
| **MCAO/R + 200 mg/kg/d MCP** | 2.56±0.53 | 81.94%±1.05% | 40.35%±1.56% |
| **MCAO/R + 400 mg/kg/d MCP** | 1.89±0.33 | 81.69%±1.04% | 29.89%±8.47% |
| **MCAO/R + 800 mg/kg/d MCP** | 1.11±0.60 | 80.97%±0.94% | 20.45%±5.94% |

MCAO/R indicates middle cerebral artery occlusion/reperfusion; MCP, modified citrus pectin.

**Table 8. Numerical data for MCP pretreatment with 7 days showing effects of MCP on TUNEL and FJB positive cells counts per mm2 of C57BL/6J mice at 1 day after MCAO/R operation.**

| **Group** | **Number of animals** | **TUNEL+ cells counts** | **FJB+ cells counts** |
| --- | --- | --- | --- |
| **Sham + Vehicle** | 3 | 59±21 | 0±0 |
| **MCAO/R + Vehicle** | 3 | 795±96 | 1100±228 |
| **MCAO/R + 200 mg/kg/d MCP** | 3 | 516±70 | 571±89 |
| **MCAO/R + 400 mg/kg/d MCP** | 3 | 365±57 | 352±55 |
| **MCAO/R + 800 mg/kg/d MCP** | 3 | 247±36 | 142±21 |

MCAO/R indicates middle cerebral artery occlusion/reperfusion; MCP, modified citrus pectin; TUNEL, Terminal-deoxynucleotidyl Transferase Mediated Nick End Labeling; FJB, Fluoro-Jade B.

**Table 9. Numerical data for MCP attenuated neuronal cell viability, injury, and apoptosis in OGD/R model.**

| **Group** | **Number of cells** | **Cell viability** | **LDH activity** | **Cell apoptosis** |
| --- | --- | --- | --- | --- |
| **Control** | 5 | 100%±0.00% | 80.661±4.892 | 3.38%±0.45% |
| **OGD/R** | 5 | 80.75%±8.20% | 310.413±6.942 | 14.34%±2.72% |
| **OGD/R + 1 g/L MCP** | 5 | 87.30%±13.88% | 275.702±3.967 | 10.06%±1.21% |
| **OGD/R + 2 g/L MCP** | 5 | 92.91%±11.98% | 239.339±2.496 | 7.45%±0.26% |
| **OGD/R + 4 g/L MCP** | 5 | 94.09%±16.55% | 161.653±4.545 | 7.15%±0.22% |

OGD/R indicates oxygen-glucose deprivation/reperfusion; MCP, modified citrus pectin.

**Table 10. Numerical data for MCP attenuated neuronal cell viability, injury, and apoptosis in OGD/R model and supernatant .**

| **Group** | **Number of cells** | **Cell viability** | **LDH activity** | **Cell apoptosis** |
| --- | --- | --- | --- | --- |
| **Control** | 5 | 100%±0.00% | 85.289±2.624 | 6.71%±0.06% |
| **OGD/R** | 5 | 49.91%±5.19% | 422.810±4.472 | 29.10%±1.94% |
| **OGD/R + 1 g/L MCP** | 5 | 56.57%±9.69% | 416.198±3.188 | 22.16%±3.44% |
| **OGD/R + 2 g/L MCP** | 5 | 64.08%±11.92% | 384.463±4.472 | 18.32%±0.41% |
| **OGD/R + 4 g/L MCP** | 5 | 77.41%±17.05% | 338.843±3.188 | 15.59%±0.27% |

OGD/R indicates oxygen-glucose deprivation/reperfusion; MCP, modified citrus pectin.

**Table 11. Numerical data for MCP treatment reduced the co-expression of NLRP3 and Iba1 in C57BL/6J mice at 1 day after MCAO/R operation.**

| **Group** | **Number of animals** | **NLRP3+ and Iba1+ cells counts per mm2** |
| --- | --- | --- |
| **Sham + Vehicle** | 3 | 18±8 |
| **MCAO/R + Vehicle** | 3 | 87±16 |
| **MCAO/R + 200 mg/kg/d MCP** | 3 | 73±16 |
| **MCAO/R + 400 mg/kg/d MCP** | 3 | 64±16 |
| **MCAO/R + 800 mg/kg/d MCP** | 3 | 32±8 |

MCAO/R indicates middle cerebral artery occlusion/reperfusion; MCP, modified citrus pectin; NLRP3, NOD-like receptor 3.

**Table 12. Numerical data for effects of MCP on NLRP3, cleaved-caspase-1/caspase-1, and IL-1β after MCAO/R injury.**

| **Group** | **Number of animals** | **NLRP3** | **Cleaved-caspase-1** | **Caspase-1** | **IL-1β** |
| --- | --- | --- | --- | --- | --- |
| **Sham + Vehicle** | 3 | 1.00±0.00 | 1.00±0.00 | 1.00±0.00 | 1.00±0.00 |
| **MCAO/R + Vehicle** | 3 | 5.77±1.12 | 6.98±1.91 | 1.06±0.23 | 3.10±0.58 |
| **MCAO/R + 200 mg/kg/d MCP** | 3 | 3.90±1.09 | 5.12±1.11 | 1.10±0.06 | 2.67±0.69 |
| **MCAO/R + 400 mg/kg/d MCP** | 3 | 2.66±0.40 | 2.95±0.34 | 1.05±0.05 | 1.82±0.23 |
| **MCAO/R + 800 mg/kg/d MCP** | 3 | 1.60±0.38 | 1.49±0.92 | 1.04±0.12 | 1.44±0.40 |

MCAO/R indicates middle cerebral artery occlusion/reperfusion; MCP, modified citrus pectin; NLRP3, NOD-like receptor 3.

**Table 13. Numerical data for effects of MCP on NLRP3, cleaved-caspase-1/caspase-1, and IL-1β in BV-2 cells after OGD/R.**

| **Group** | **Number of cells** | **NLRP3** | **Cleaved-caspase-1** | **Caspase-1** | **IL-1β** |
| --- | --- | --- | --- | --- | --- |
| **Control** | 5 | 1.00±0.00 | 1.00±0.00 | 1.00±0.00 | 1.00±0.00 |
| **OGD/R** | 5 | 4.26±0.33 | 4.49±1.07 | 0.96±0.09 | 4.83±0.87 |
| **OGD/R + 1 g/L MCP** | 5 | 3.42±0.26 | 3.36±0.49 | 1.03±0.01 | 3.12±0.74 |
| **OGD/R + 2 g/L MCP** | 5 | 2.36±0.53 | 2.34±0.45 | 1.03±0.02 | 2.46±0.54 |
| **OGD/R + 4 g/L MCP** | 5 | 1.46±0.29 | 1.59±0.25 | 1.04±0.04 | 1.23±0.35 |

OGD/R indicates oxygen-glucose deprivation/reperfusion; MCP, modified citrus pectin; NLRP3, NOD-like receptor 3.

**Table 14. Numerical data for MCP treatment reduced the co-expression of galectin-3 and Iba1 in C57BL/6J mice at 1 day after MCAO/R operation.**

| **Group** | **Number of animals** | **Galectin-3+ and Iba1+ cells counts per mm2** |
| --- | --- | --- |
| **Sham + Vehicle** | 3 | 0±0 |
| **MCAO/R + Vehicle** | 3 | 110±14 |
| **MCAO/R + 200 mg/kg/d MCP** | 3 | 82±14 |
| **MCAO/R + 400 mg/kg/d MCP** | 3 | 55±14 |
| **MCAO/R + 800 mg/kg/d MCP** | 3 | 46±8 |

MCAO/R indicates middle cerebral artery occlusion/reperfusion; MCP, modified citrus pectin.

**Table 15. Numerical data for effects of MCP on TLR4, NF-κB p65, and galectin-3 in cerebral cortex after MCAO/R injury.**

| **Group** | **Number of animals** | **Galectin-3** | **TLR4** | **NF-κB** |
| --- | --- | --- | --- | --- |
| **Sham + Vehicle** | 3 | 1.00±0.00 | 1.00±0.00 | 1.00±0.00 |
| **MCAO/R + Vehicle** | 3 | 5.64±0.59 | 5.76±1.43 | 1.96±0.19 |
| **MCAO/R + 200 mg/kg/d MCP** | 3 | 3.70±0.66 | 4.88±1.48 | 1.61±0.44 |
| **MCAO/R + 400 mg/kg/d MCP** | 3 | 2.48±0.40 | 3.31±0.95 | 1.26±0.25 |
| **MCAO/R + 800 mg/kg/d MCP** | 3 | 1.45±0.20 | 1.73±0.67 | 1.09±0.05 |

MCAO/R indicates middle cerebral artery occlusion/reperfusion; MCP, modified citrus pectin.

**Table 16. Numerical data for effects of MCP on TLR4, NF-κB p65, and galectin-3 in BV-2 cells after OGD/R injury.**

| **Group** | **Number of cells** | **Galectin-3** | **TLR4** | **NF-κB** |
| --- | --- | --- | --- | --- |
| **Control** | 5 | 1.00±0.00 | 1.00±0.00 | 1.00±0.00 |
| **OGD/R** | 5 | 5.68±0.24 | 5.76±1.98 | 2.36±0.43 |
| **OGD/R + 1 g/L MCP** | 5 | 3.78±0.84 | 4.36±1.21 | 2.08±0.36 |
| **OGD/R + 2 g/L MCP** | 5 | 2.33±0.16 | 3.35±0.98 | 1.60±0.23 |
| **OGD/R + 4 g/L MCP** | 5 | 1.34±0.25 | 2.20±0.81 | 1.19±0.16 |

OGD/R indicates oxygen-glucose deprivation/reperfusion; MCP, modified citrus pectin.

**Supplemental Figures**


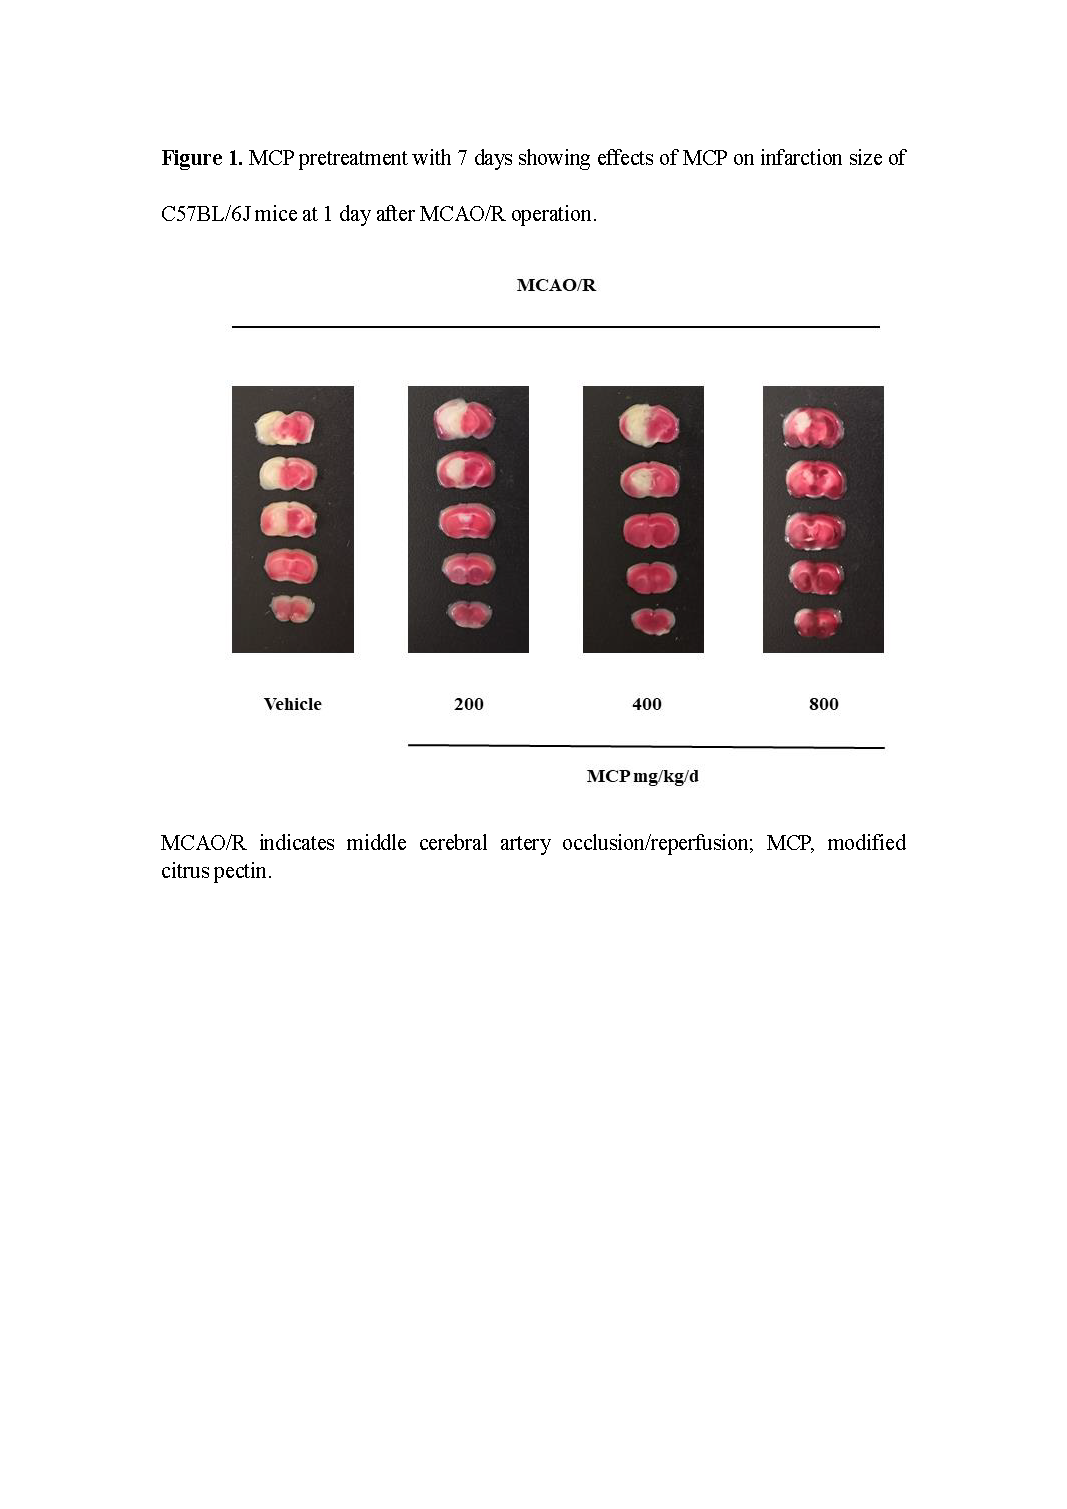


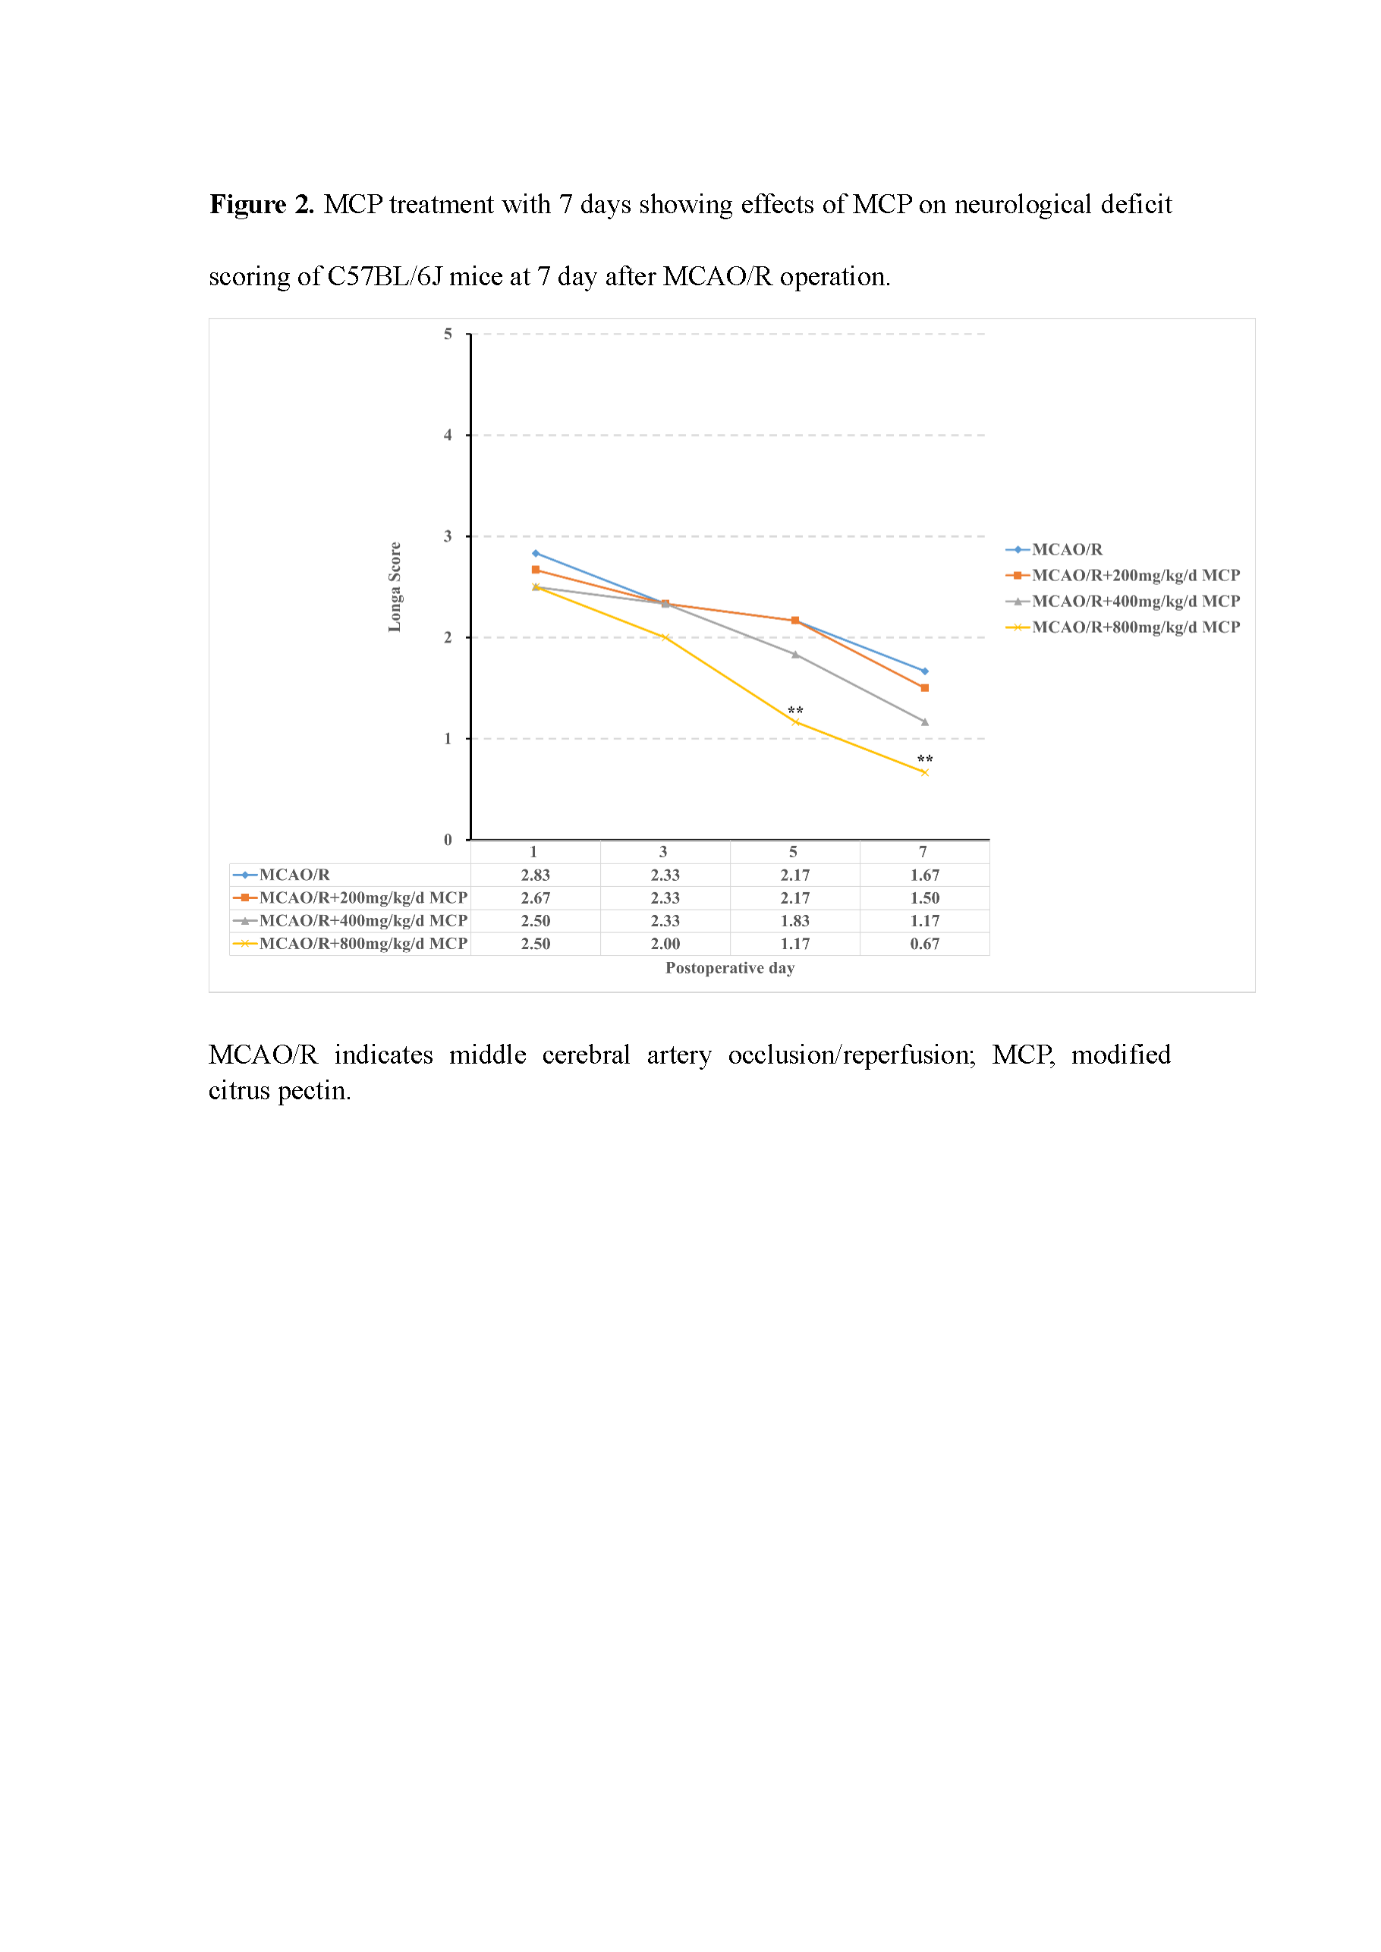


**
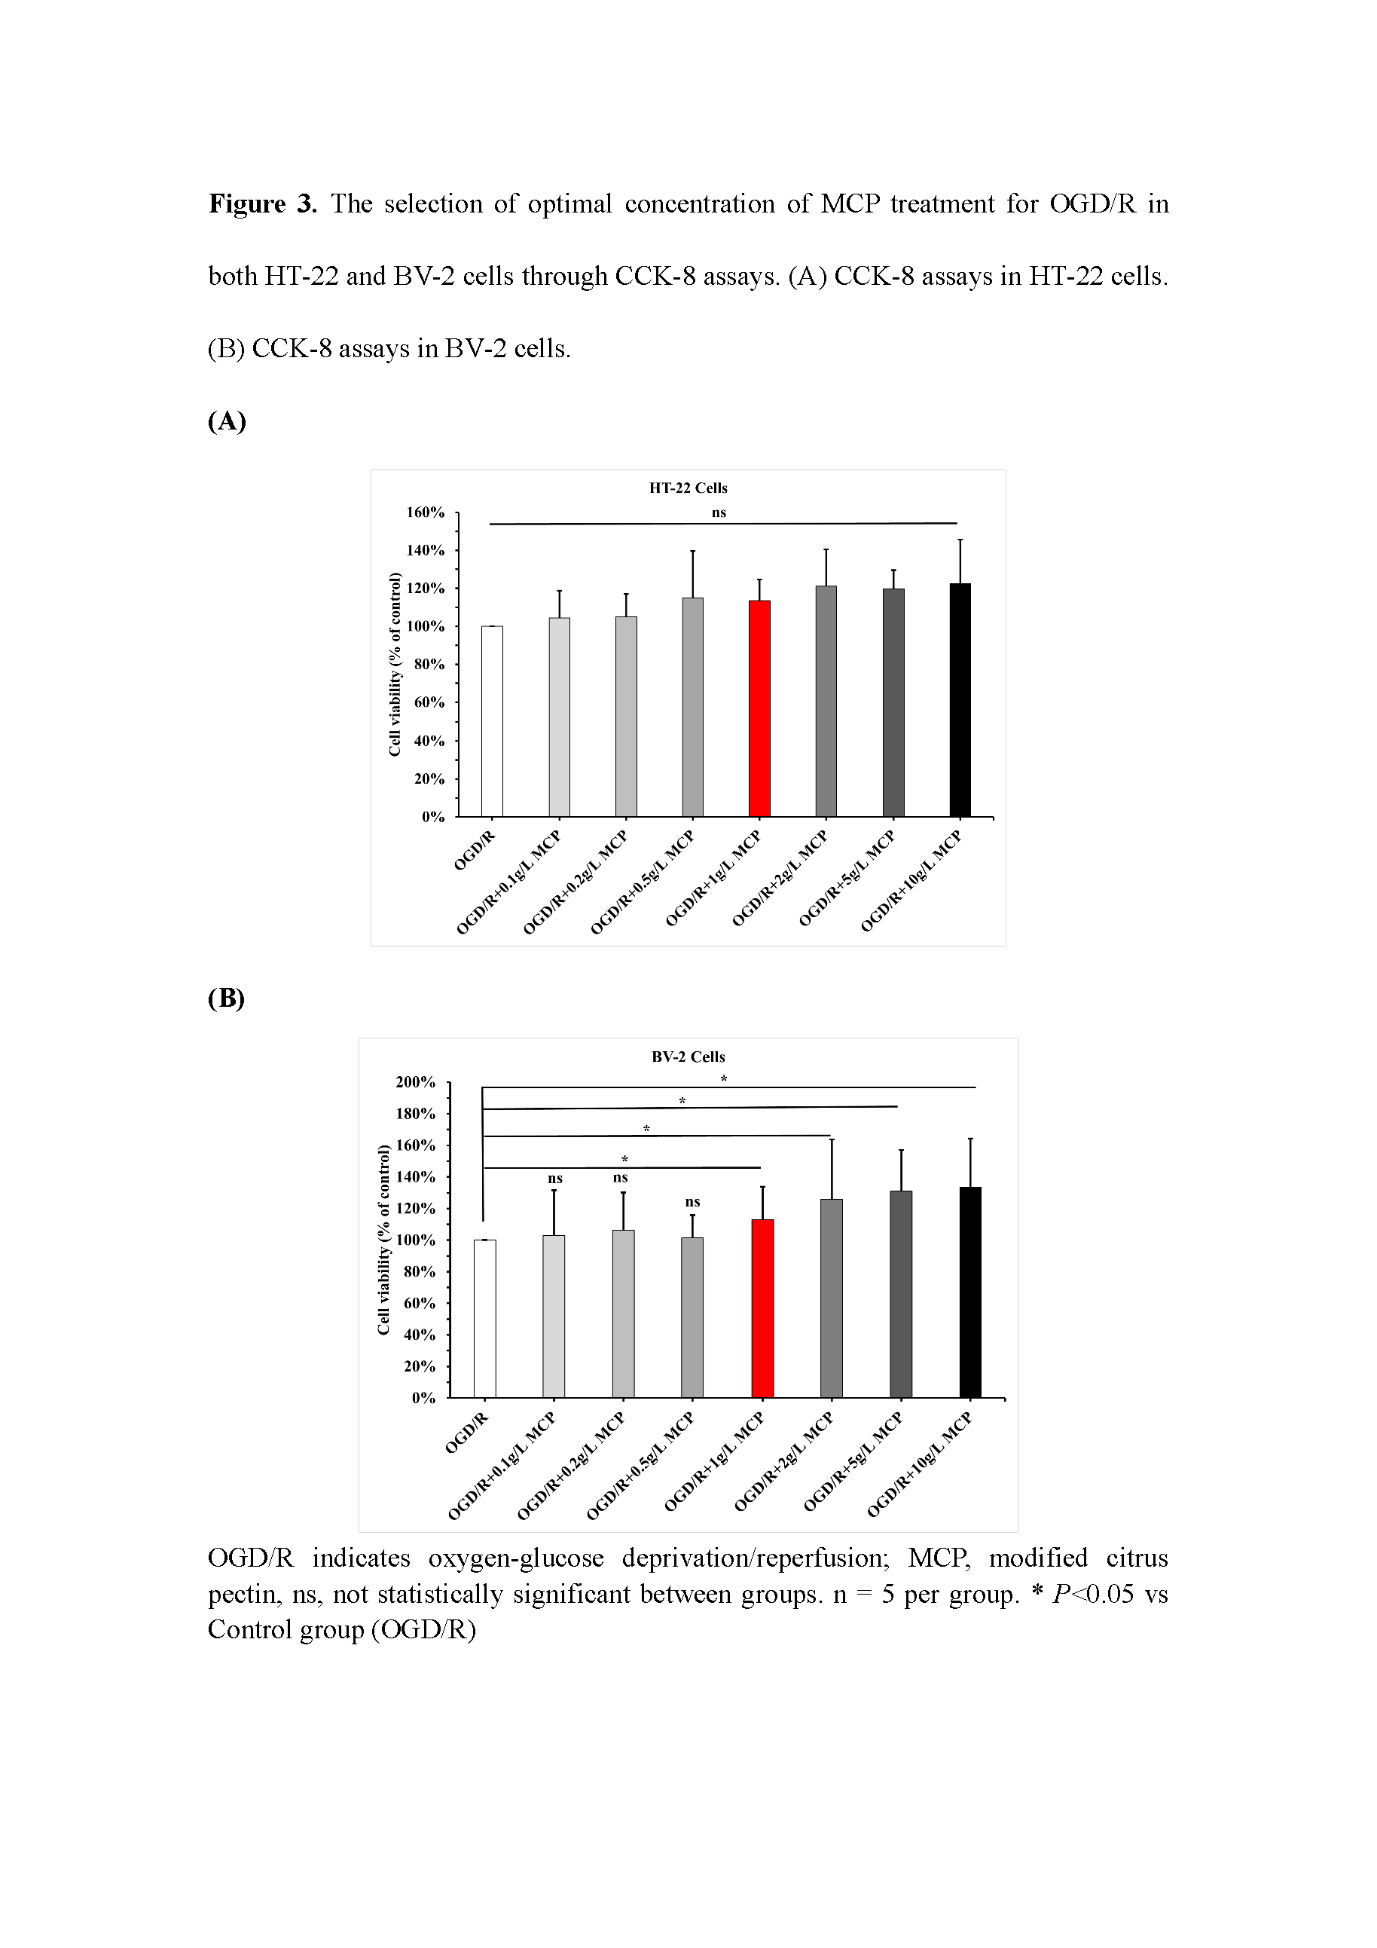
**

**
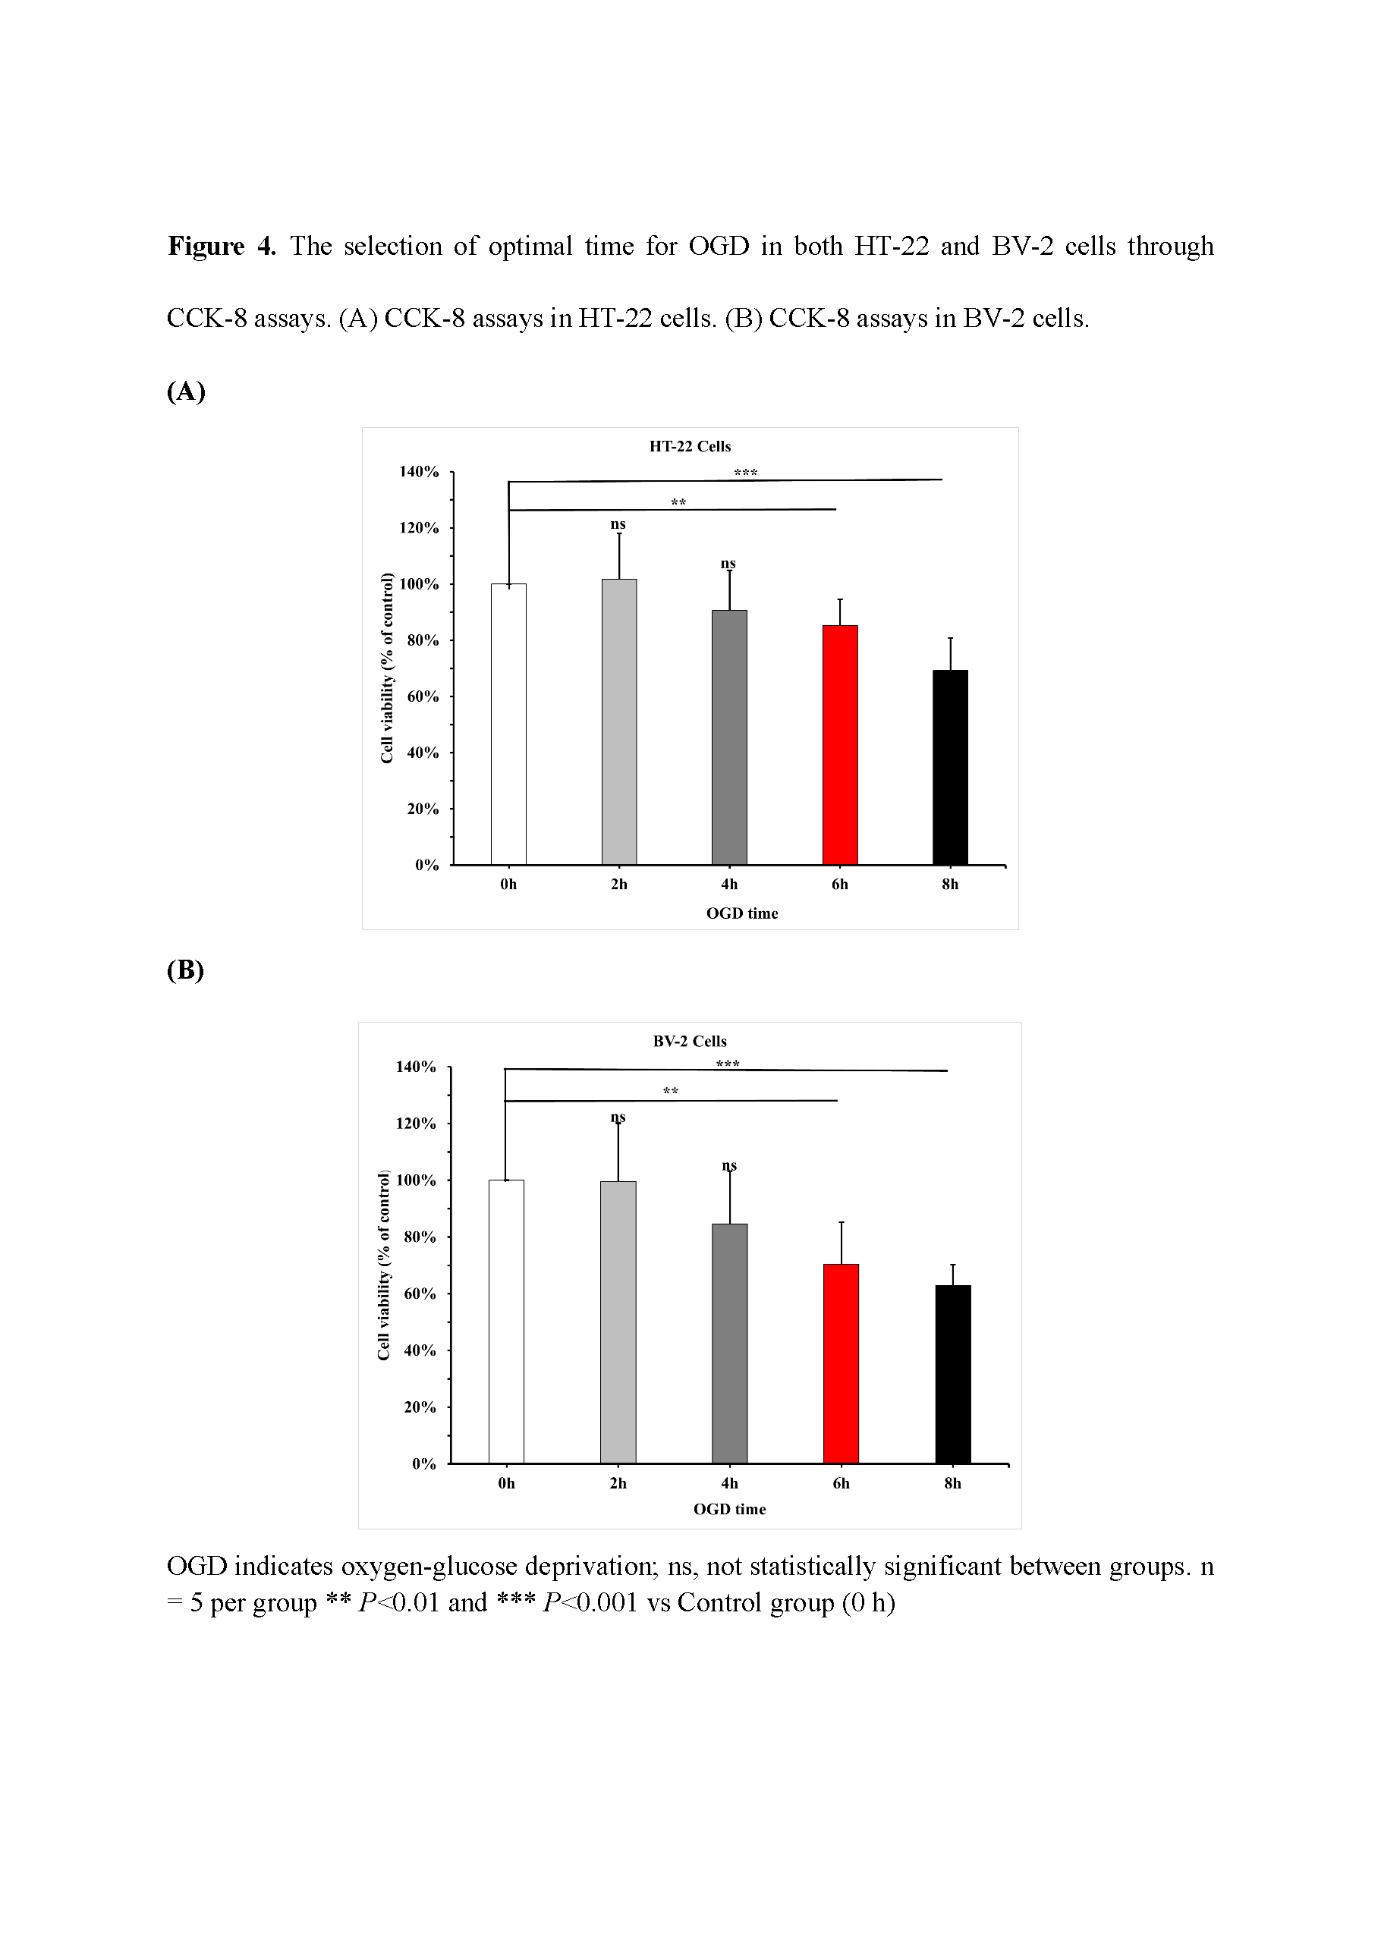
**
